# Supplementary material for: Early assessment of antibodies decline in Chagas patients following treatment using a serological multiplex immunoassay
Source: PubMed Central journal article supplement — Nat Commun. 2024 Dec 3;15:10530. doi: 10.1038/s41467-024-54910-x (PMC11615370; doi:10.1038/s41467-024-54910-x), 2024-12-03
Supplement: 41467_2024_54910_MOESM3_ESM.pdf [file 41467_2024_54910_MOESM3_ESM.pdf]

### **Description of Additional Supplementary Files**

File Name: Supplementary Software 1

Description: VBA Code for the DF50 calculations with Instructions for Use, SAS Code for Linear Mixed Models, the DF50 detailed calculations method (.xlsx format) and the BENDITA raw data with the macro in VBA applied on the data (.xlsm format).
